# Supplementary material
Source: Springer Nature journal article supplement (https://www.springermedizin.de/resource/supplementary/12913_2013_3069_MOESM4_ESM.pdf/9532340)

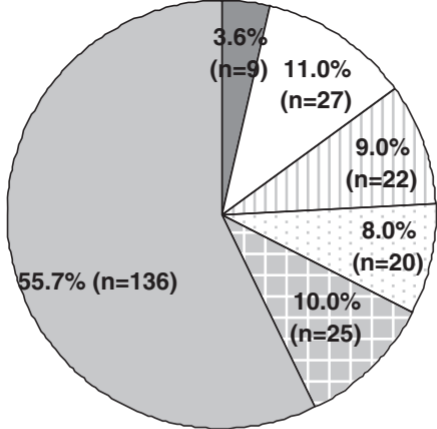

■ 1-5 physicians

□ 6-10 physicians

▨ 11-15 physicians

▩ 16-20 physicians

▧ 21-25 physicians

■ more than 25 physicians

Supplement: MOESM4 [file 9532340]
